# Supplementary material for: Inverted perovskite solar cells with enhanced lifetime and thermal stability enabled by a metallic tantalum disulfide buffer layer
Source: Royal Society of Chemistry journal article supplement (doi:10.1039/d1na00172h), 2021-01-01
Supplement: d1na00172h1.pdf [file d1na00172h1.pdf]

Supplementary material

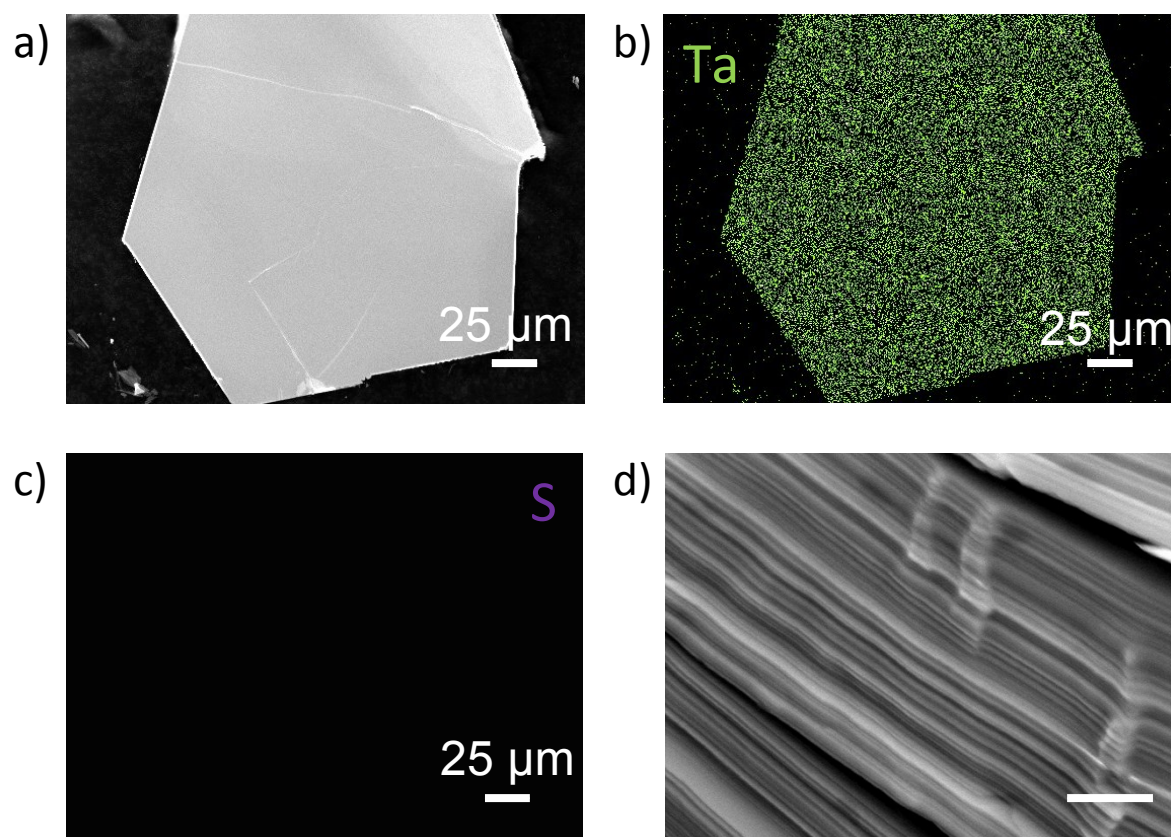

**Figure S1.** a) SEM image of the as-synthesized 6R-TaS<sub>2</sub> crystals and b,c) the corresponding EDS maps for Ta (M line at 1.71 keV, in green) and S (Kα line at 2.31 keV, in violet). d) High-magnification SEM image of an edge of a fragment of 6R-TaS<sub>2</sub> crystal, showing its layered structure.

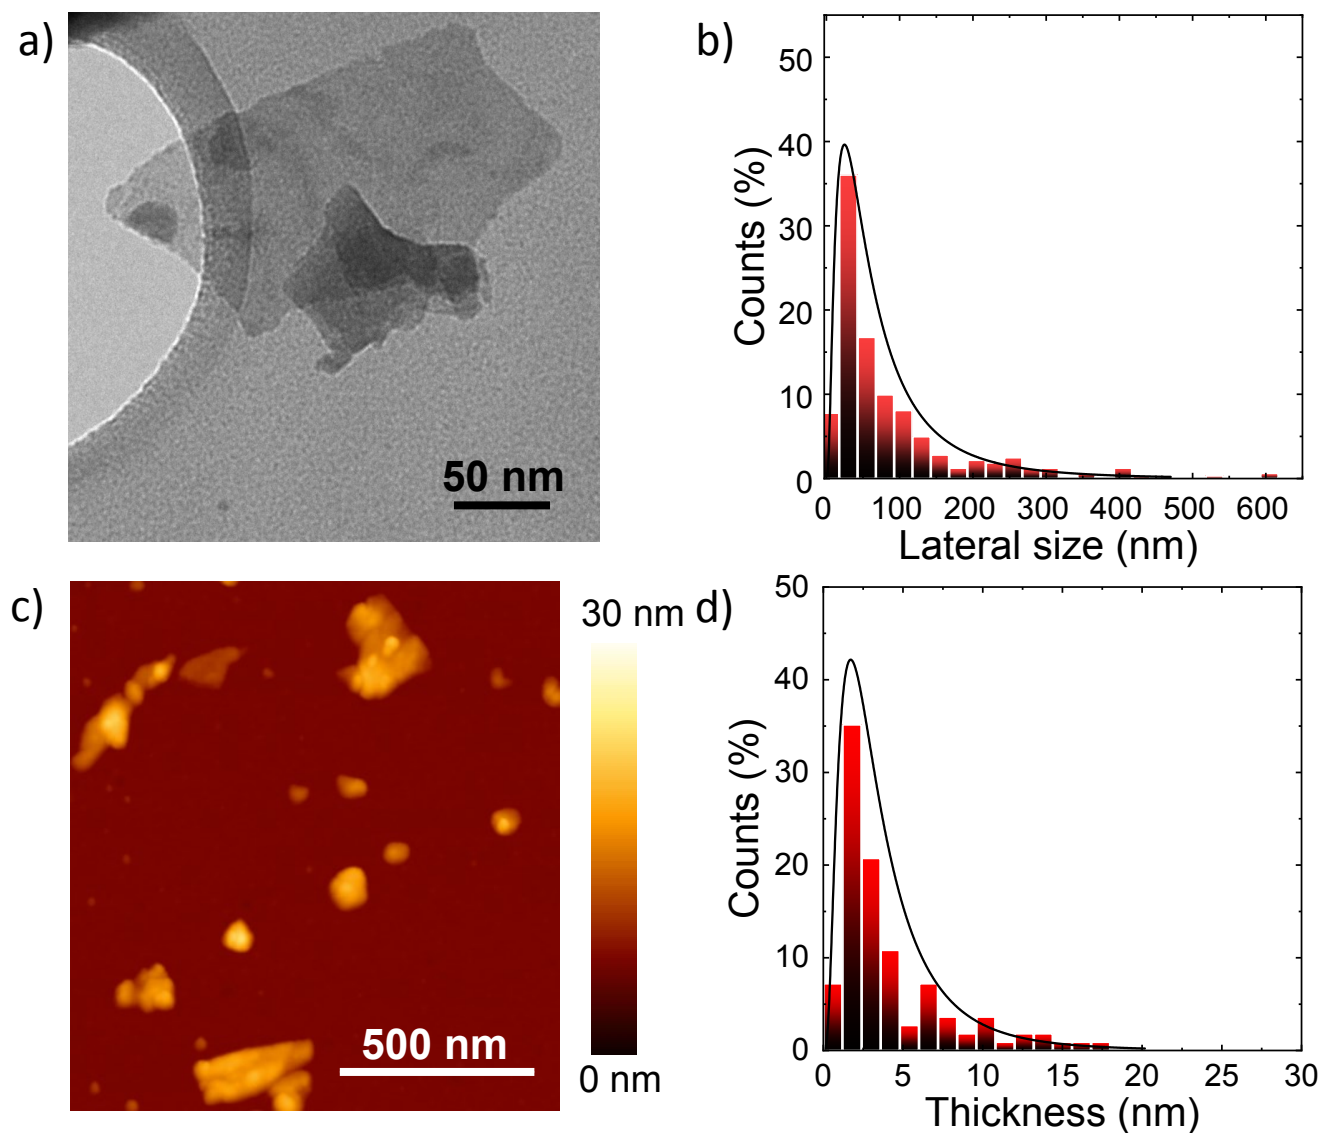

**Figure S2.** a) BF-TEM image of representative TaS<sub>2</sub> flakes and b) the statistical analysis of their lateral size (calculated on 300 flakes). c) AFM image of representative TaS<sub>2</sub> flakes and d) statistical analysis of their thickness (calculated on 110 flakes)

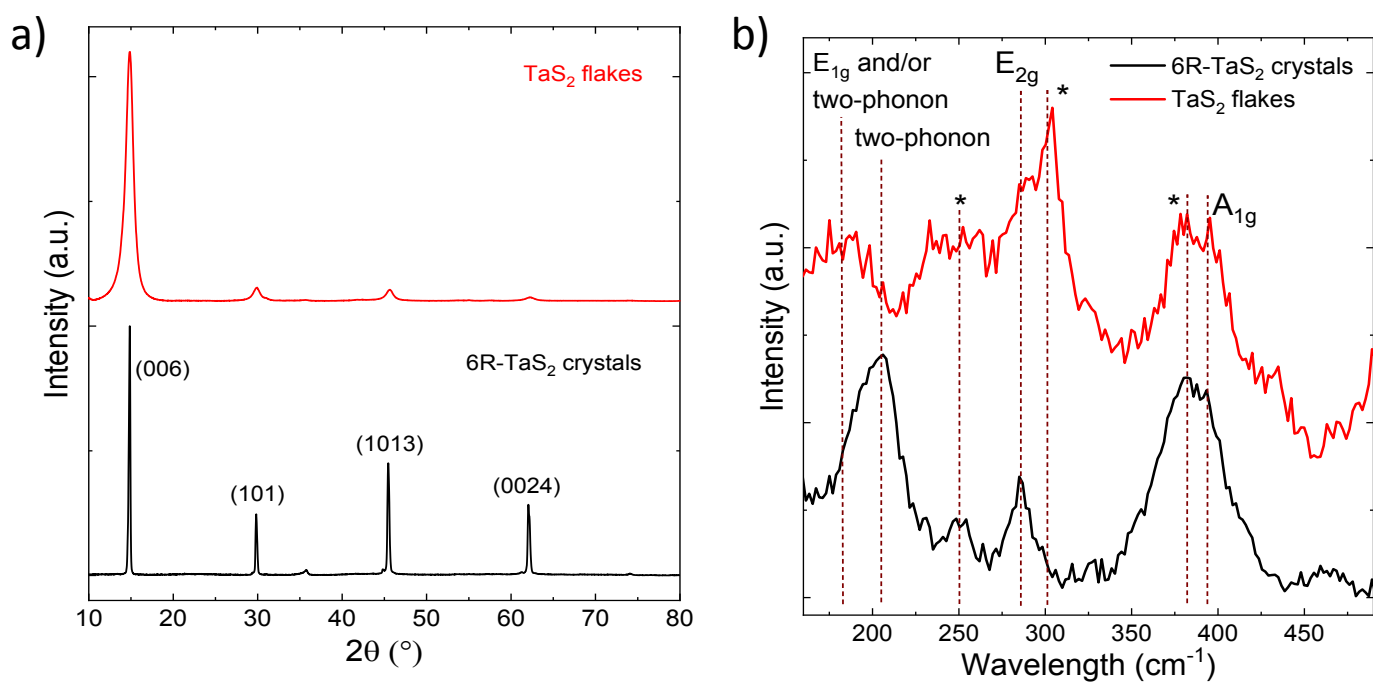

**Figure S3.** XRD spectra of the as-synthesized 6R-TaS<sub>2</sub> crystals and the TaS<sub>2</sub> flakes. b) Raman spectra of the as-synthesized 6R-TaS<sub>2</sub> crystals and the TaS<sub>2</sub> flakes. The Raman modes that have been identified for the 2H-TaS<sub>2</sub> are also denominated. The symbol \* indicates possible fold-back optical modes attributed to the presence of layers with octahedral Ta coordination (similarly to those observed in 1T-TaS<sub>2</sub>).

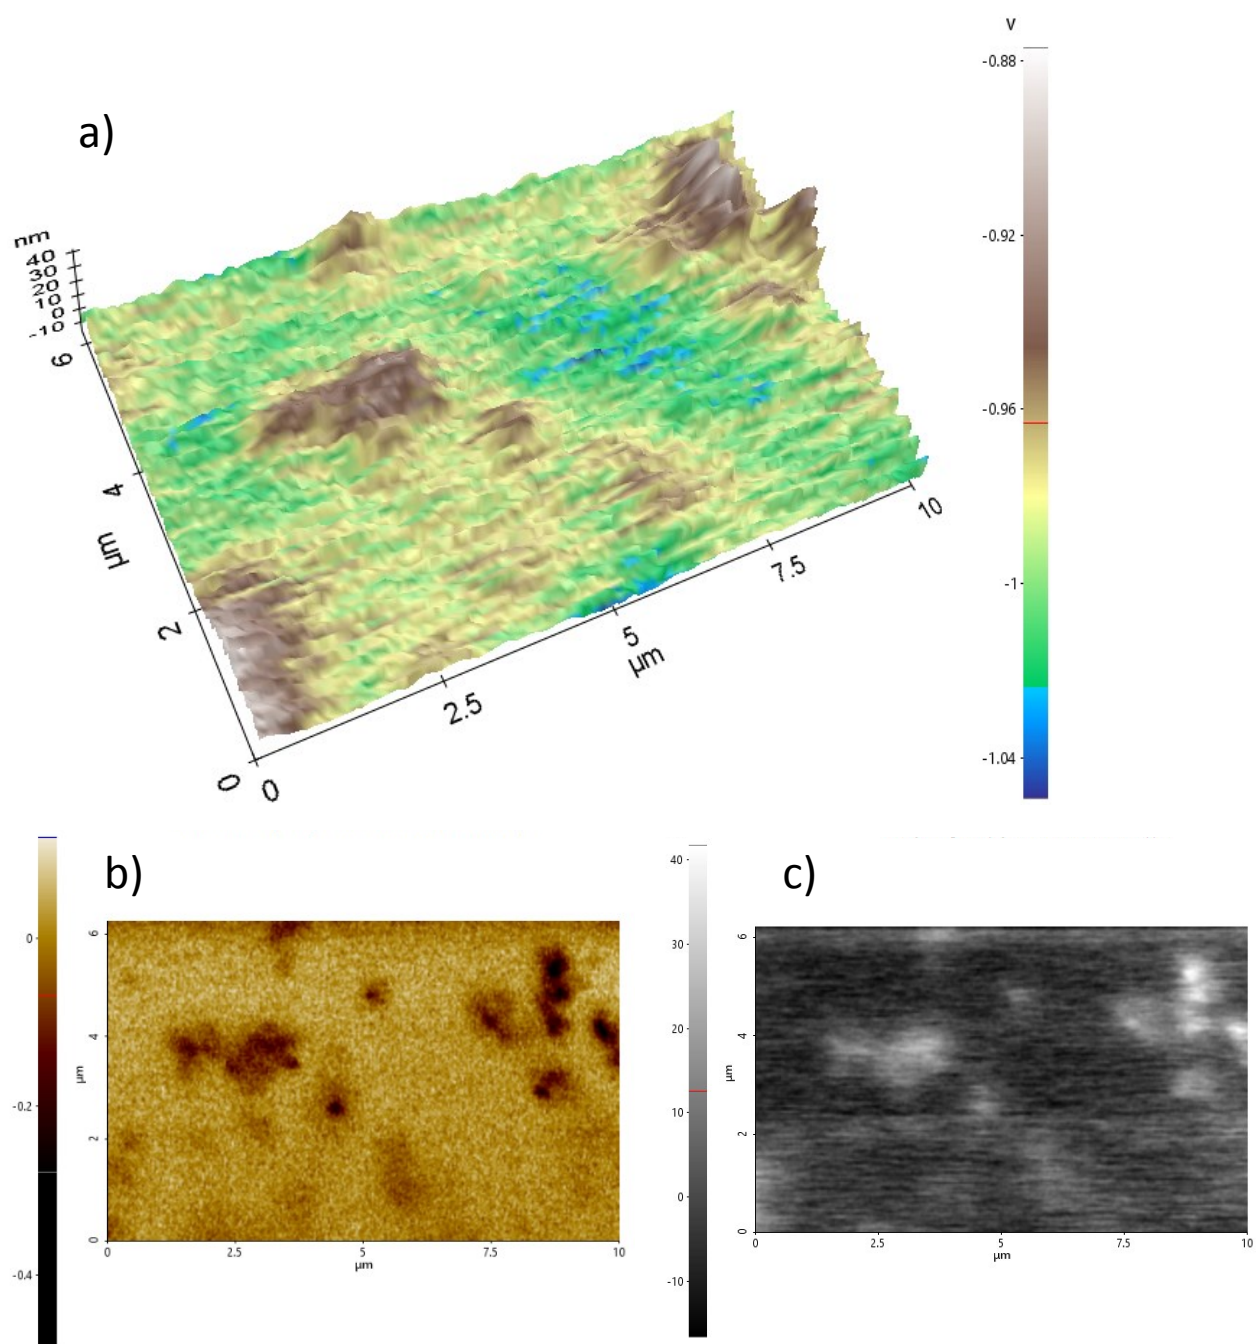

**Figure S4.** KPFM images of TaS<sub>2</sub> flakes spin coating on ITO. a) 3D representation of surface topography overlaid by KPFM contact potential, b) surface NC topography and c) NC phase image.

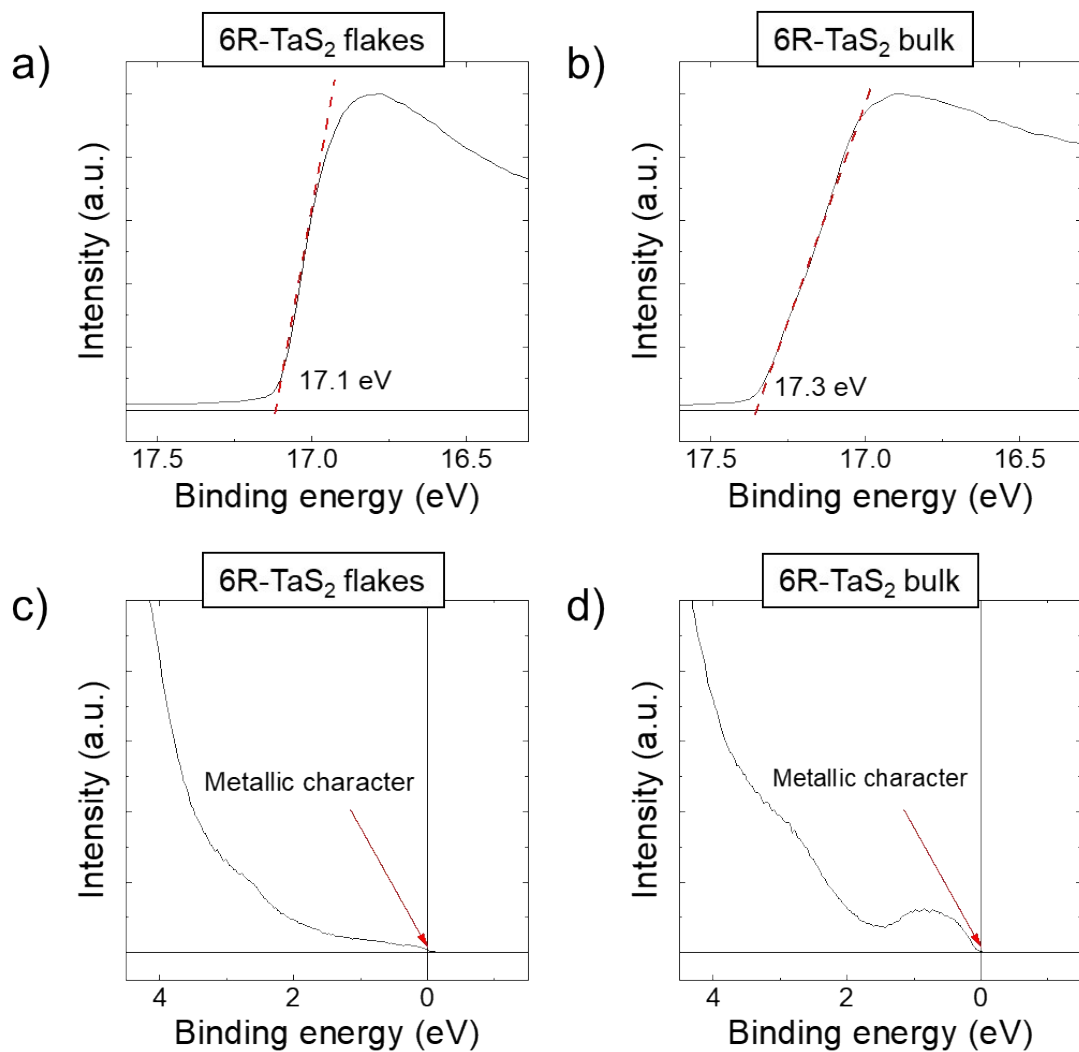

**Figure S5.** a,b) High binding energy regions of the ultraviolet photoelectron spectroscopy (UPS) spectra measured for 6R-TaS<sub>2</sub> flakes and bulk crystals, respectively. c,d) Low binding energy region of the UPS spectra measured for 6R-TaS<sub>2</sub> flakes and bulk crystals, respectively.



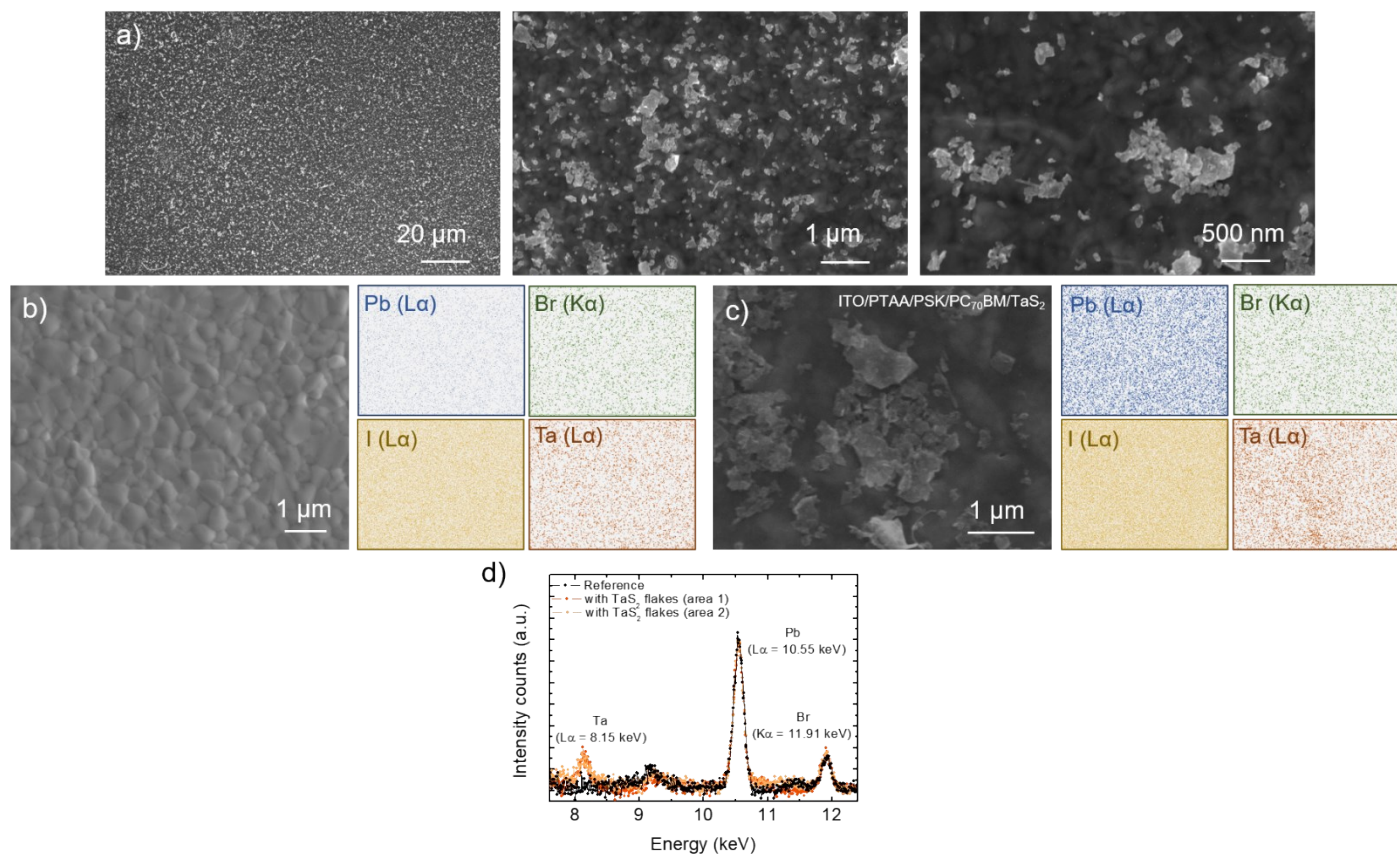

**Figure S6.** a) Low-magnification SEM images of the TaS<sub>2</sub> buffer layer deposited onto the PC<sub>70</sub>BM surface. b) SEM and EDS maps of the PC<sub>70</sub>BM and c) of the TaS<sub>2</sub> buffer layer deposited onto PC<sub>70</sub>BM. d) Comparison of the EDS spectra collected for the PC<sub>70</sub>BM and TaS<sub>2</sub> enabled PC<sub>70</sub>BM at two different spots.

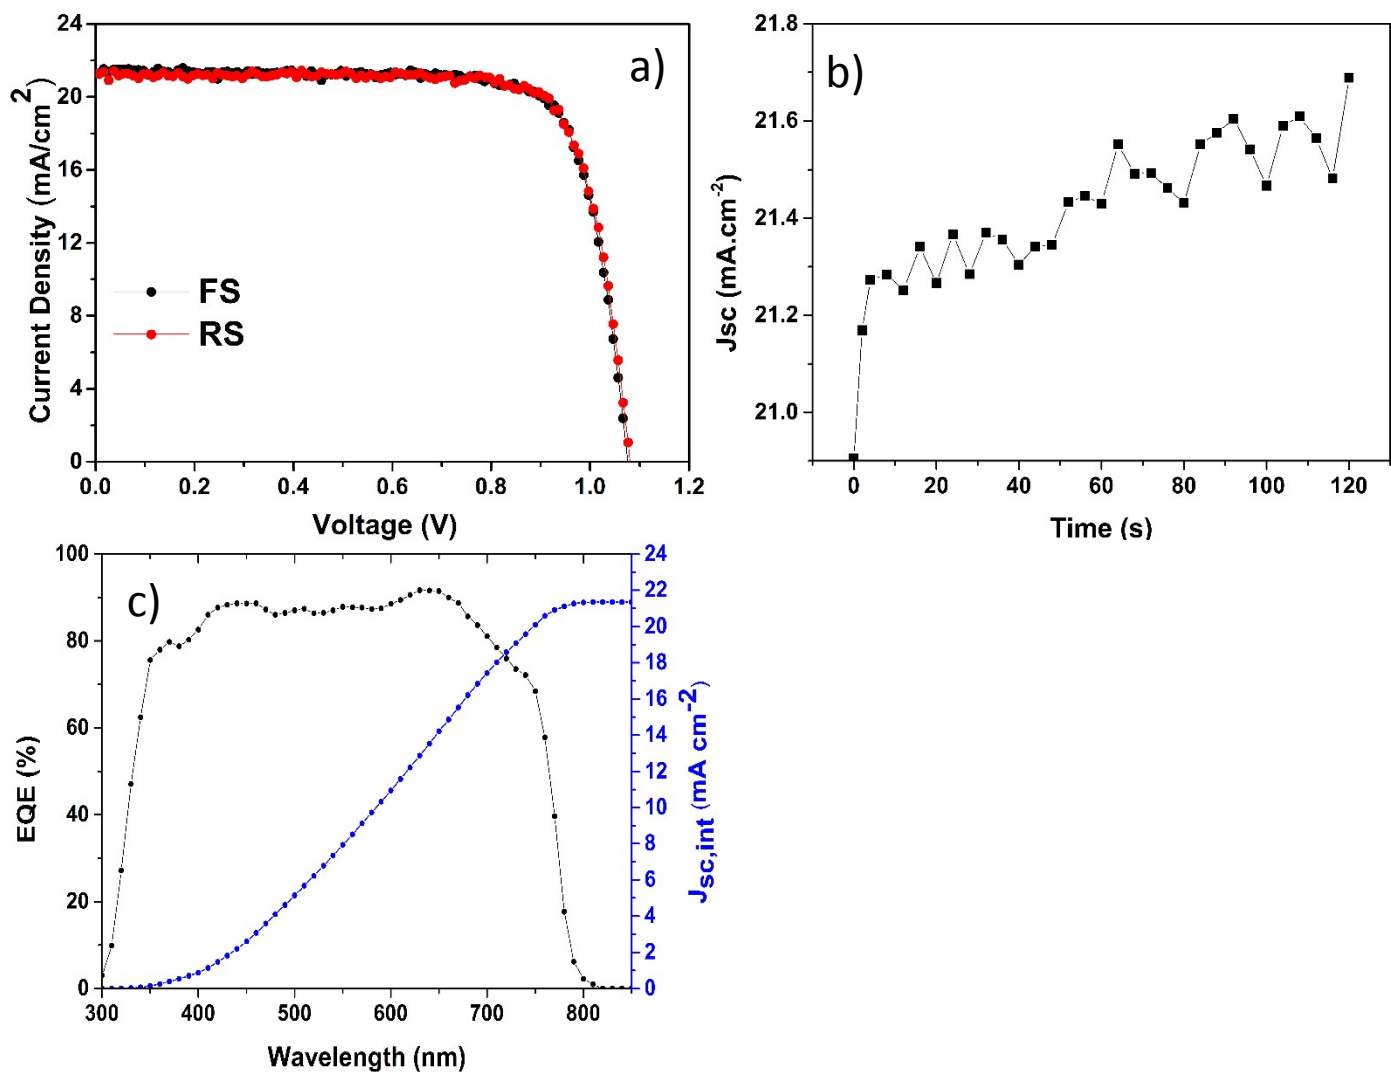

**Figure S7.** (a) J-V curves in forward and reverse scan directions of PSC-2 device revealing negligible hysteresis. (b) Evolution of photocurrent at short circuit for 2 minutes. (c) EQE spectrum of a representative device and the integrated current density of the device's spectral response with the AM1.5G photon flux spectrum is depicted on the right axis.

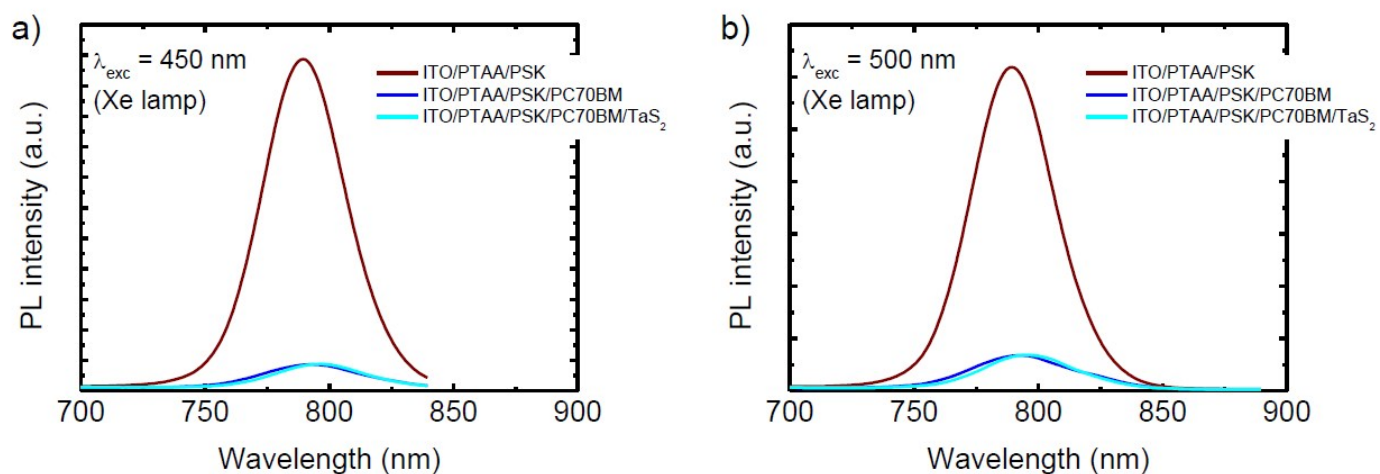

**Figure S8.** PL measurements of the structures ITO/PTAA/PSK, ITO/PTAA/PSK/PC<sub>70</sub>BM, ITO/PTAA/PSK/PC<sub>70</sub>BM/TaS<sub>2</sub> using (a) 450 nm and (b) 500 nm as excitation wavelengths (source Xe lamp in a LS-55 Perkin Elmer spectrofluorometer).

**Table S1.** Device PV characteristics extracted from the J-V curves in forward and reverse scan directions.

| Sample  | PCE (%) |       | $V_{oc}$ (V) |       | $J_{sc}$ (mA cm <sup>2</sup> ) |       | FF    |       |
|---------|---------|-------|--------------|-------|--------------------------------|-------|-------|-------|
|         | FS      | RS    | FS           | RS    | FS                             | RS    | FS    | RS    |
| PSC-Ref | 17.61   | 17.66 | 1.078        | 1.081 | 20.81                          | 20.84 | 78.48 | 78.37 |
| PSC-1   | 18.24   | 18.28 | 1.068        | 1.070 | 21.64                          | 21.56 | 78.97 | 79.22 |
| PSC-2   | 18.10   | 17.84 | 1.096        | 1.097 | 21.98                          | 21.90 | 75.09 | 74.28 |
| PSC-3   | 18.31   | 18.45 | 1.076        | 1.08  | 21.58                          | 21.45 | 78.84 | 79.65 |

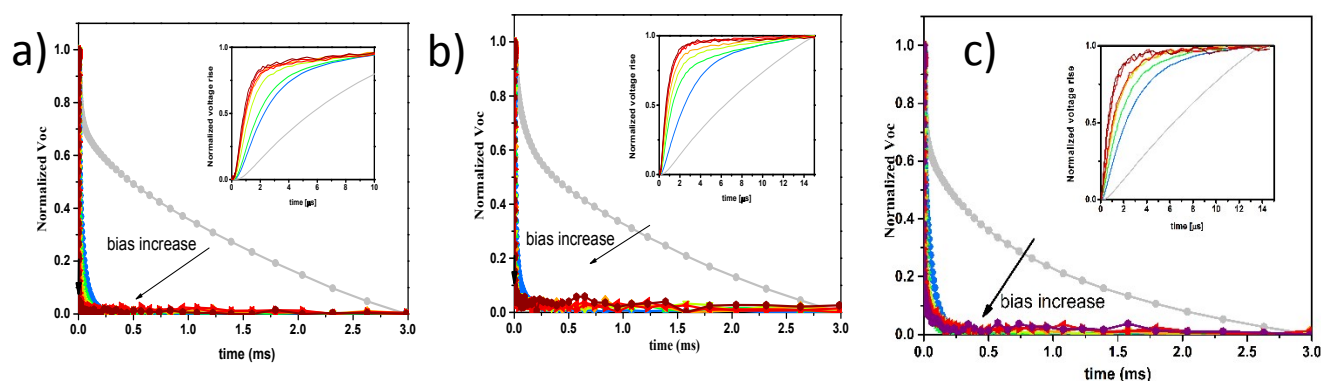

**Figure S9.** Raw data of TPV measurements for the investigated devices: a) Reference, b) PSC-1 and c) PSC-3. The insets present the voltage rise data.

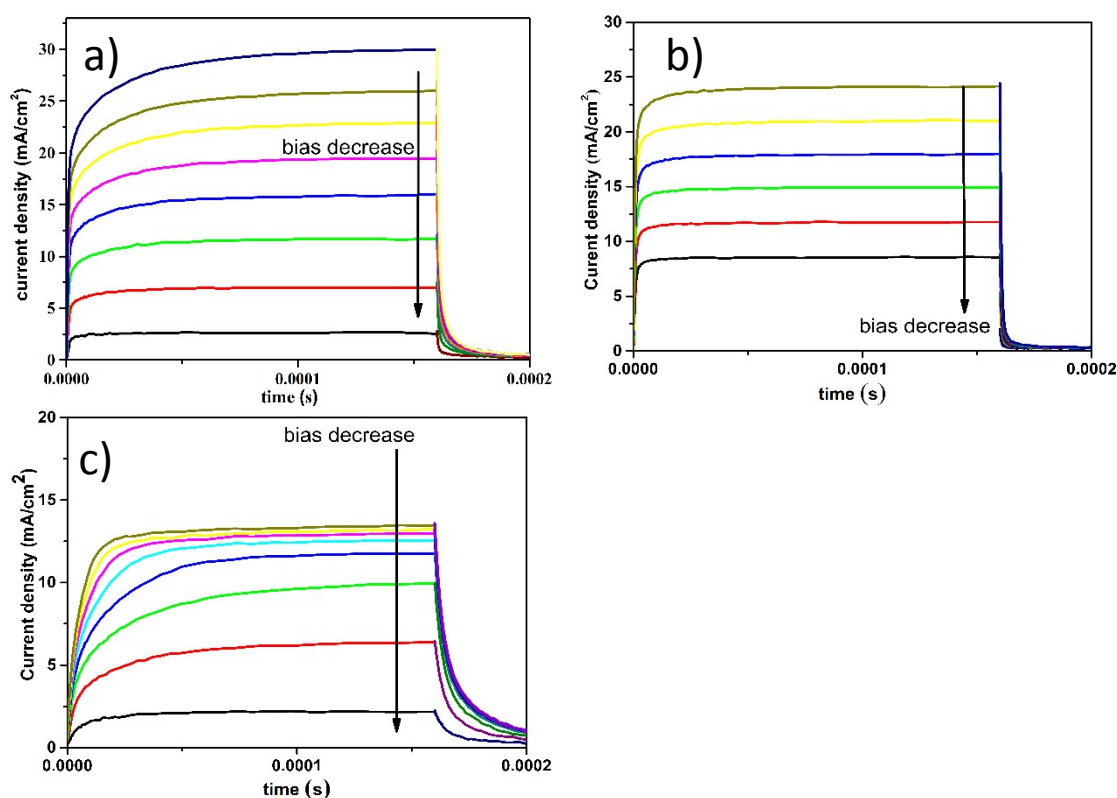

**Figure S10.** Raw data of TPC measurements for the investigated devices: a) Reference, b) PSC-1 and c) PSC-3.



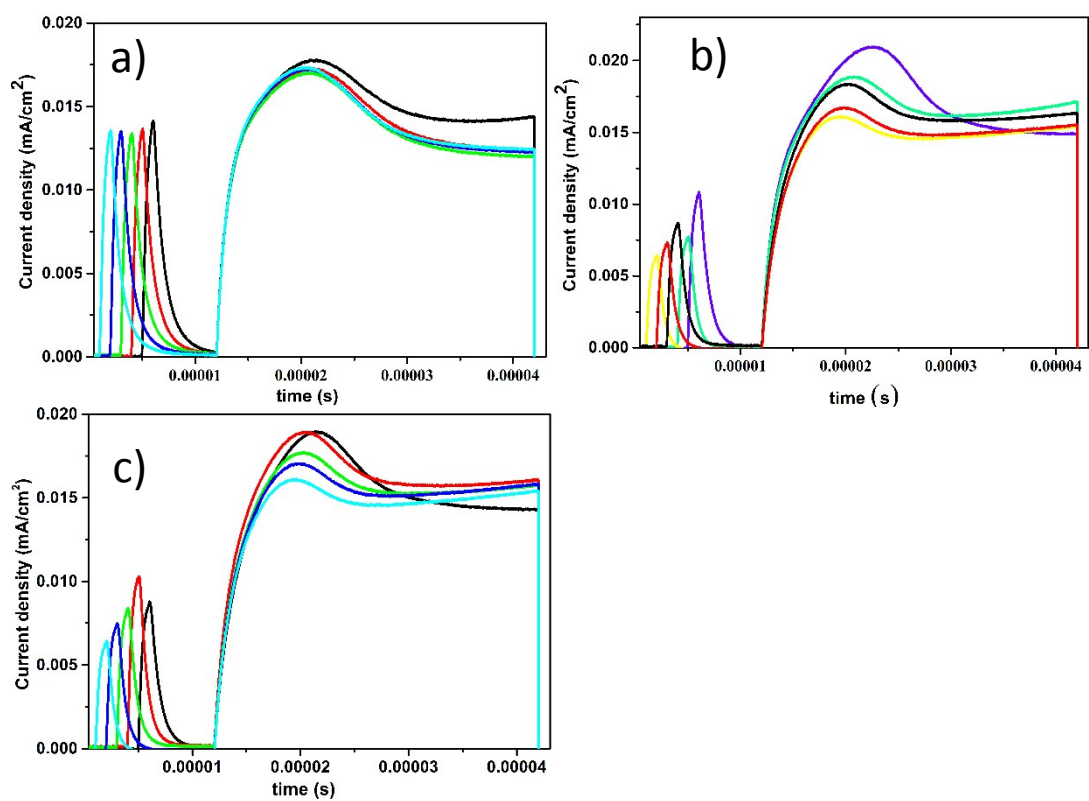

**Figure S11.** Raw data of photo-CELIV measurements used to extract the drift mobility for the investigated devices: a) Reference, b) PSC-1 and c) PSC-3.
